# Supplementary material
Source: PubMed Central journal article supplement (PMC3494810)
Supplement: NIHMS409837-supplement-01.pdf [file NIHMS409837-supplement-01.pdf]

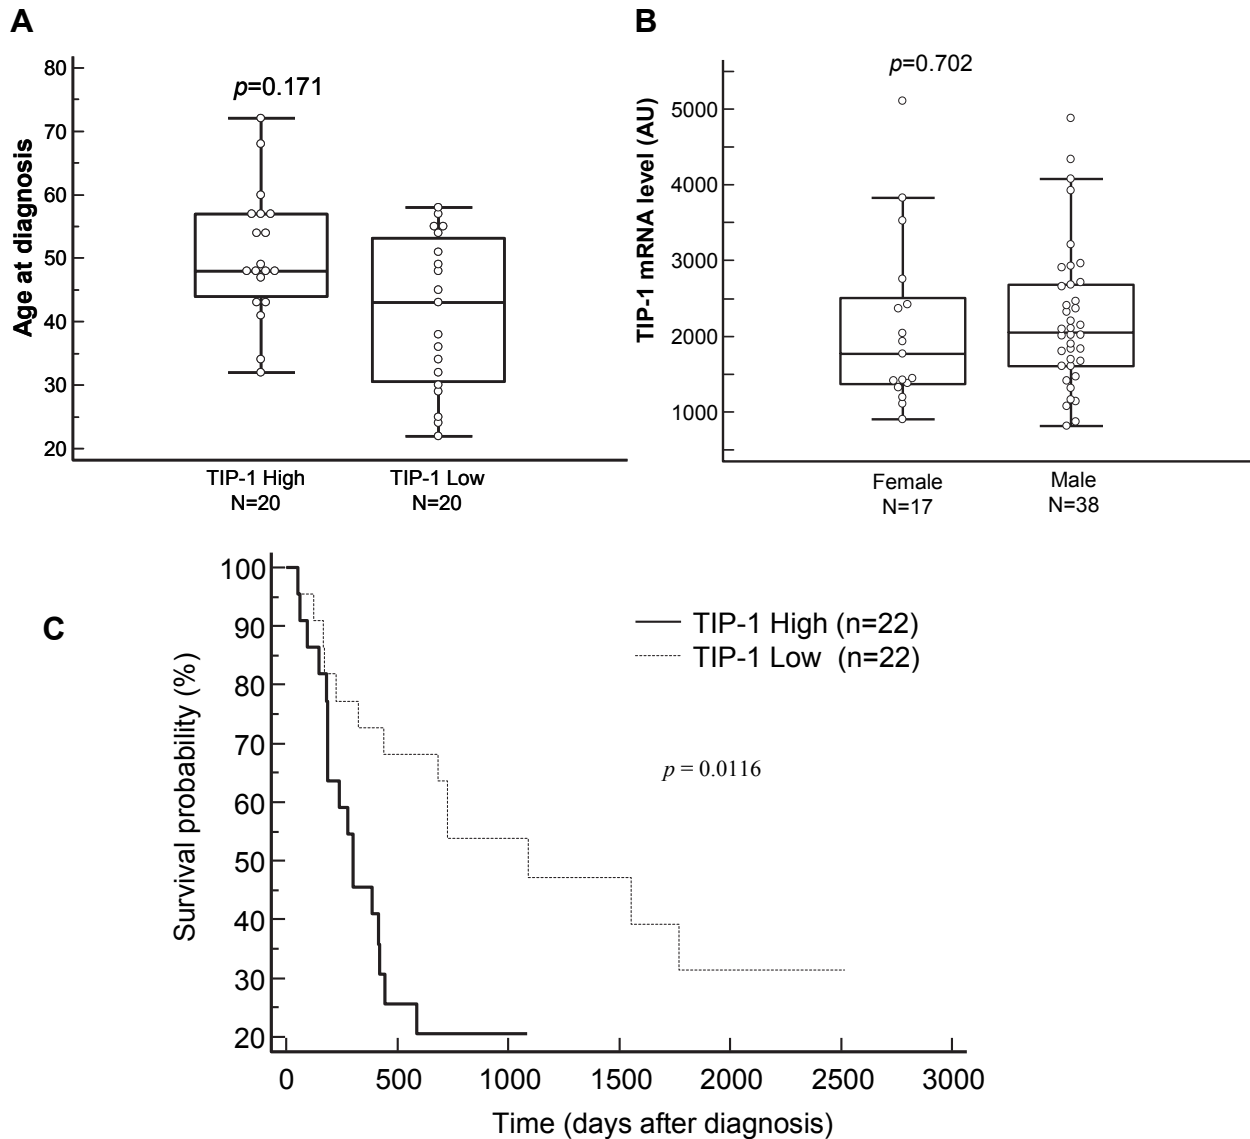

**Supplementary Fig. s1.** (A) TIP-1 expression level is independent of age of glioblastoma (WHO grade IV) patients at the time of diagnosis. The analysis was based upon dataset GDS1962 (GEO database from NCBI, NIH), in which patients are ranked upon TIP-1 expression levels. Those with upper 35% TIP-1 expression levels are grouped as “TIP-1 High”, and those with lower 35% of TIP-1 expression levels as “TIP-1 Low”. 20 patients were included in each group for statistic analysis. (B) TIP-1 expression level is independent of gender of glioblastoma (WHO grade IV) patients at the time of diagnosis. Same dataset was used as in A. 55 patients were included in the statistic analysis. (C) Survival probability analysis of glioblastoma (WHO grade IV) patients. The analysis was based upon dataset GDS1975 (GEO database from NCBI, NIH). Same standard was applied to identify the “TIP-1 High” and “TIP-1 Low” patients.  $p = 0.0116$ , 22 cases for each group. Log-rank test.

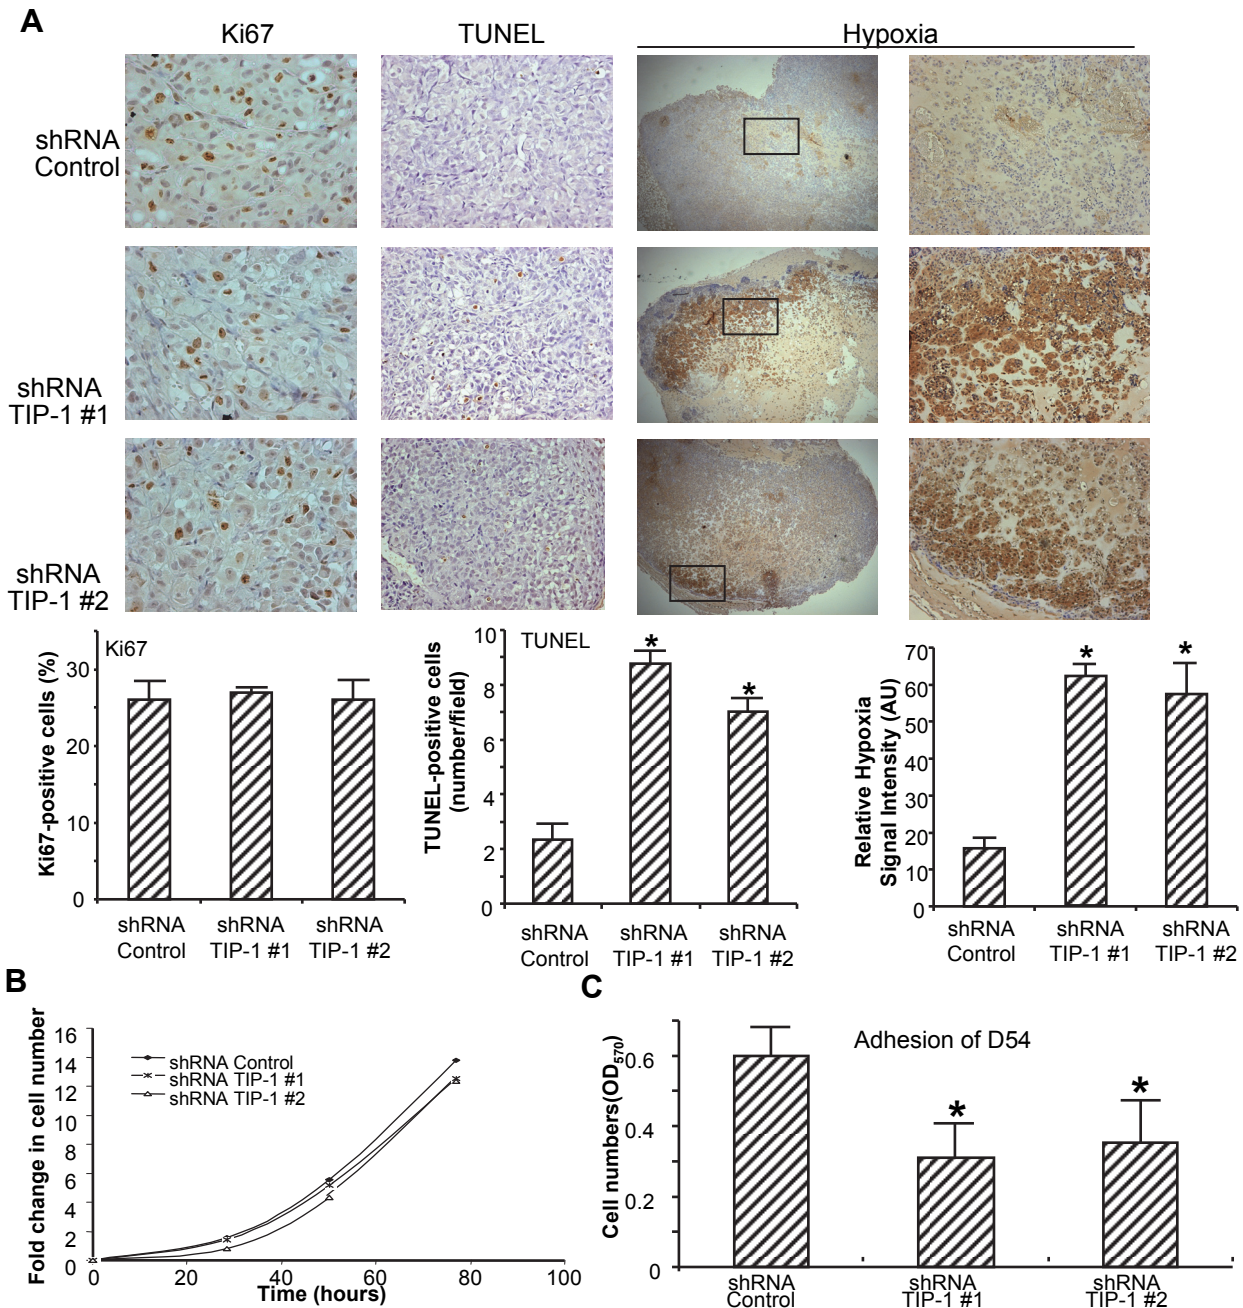

**Supplementary Fig. s2.** (A) immunohistochemical detection of cell proliferation (Ki67), apoptosis (TUNEL) and hypoxia within D54 xenografts. The hypoxic regions were defined by positive staining with Hypoxyprobe-1. Shown are representative images and quantification (ImageJ) upon more than 12 microscopic fields. (B) *In vitro* cell proliferation was determined with direct cell counting.  $4 \times 10^4$  D54 cells were seeded in multi-well plates with DMEM culture medium, cells were disaggregated for quantification with hemocytometer at multiple time points. (C) Cell adhesion assays.  $4 \times 10^4$  D54 cells within 100  $\mu$ l of medium were seeded in multi-well plates. After 3 hours incubation at 37 degree, the non-attached cells were washed off with cold phosphate buffered saline. The attached cells were stained with methylene blue, dissolved with 2% SDS solution and quantified upon the colorimetric density (570 nm). Shown are the representative data from three independent triplicated experiments. \*  $p < 0.05$ ,  $n = 3$ , the Student's *t*-test.

50: UNC5C  
 49: ICAM1  
 48: F28  
 47: JAG1  
 46: PTX3  
 45: CD180  
 44: OLR1  
 43: S1PR3  
 42: PCDH8  
 41: CD274  
 40: ADAMTS1  
 39: PDCD1LG2  
 38: PDE5A  
 37: PCSK1  
 36: TIMP3  
 35: KLF4  
 34: HSD11B1  
 33: PKIA  
 32: ZNF354A  
 31: CLDN1  
 30: AMIGO2  
 29: PCDH7  
 28: CDH11  
 27: DSP  
 26: PCDH8  
 25: PTN  
 24: LRRC17  
 23: SPRY2  
 22: TNFSF4  
 21: CD24  
 20: PLXDC1  
 19: COL8A1  
 18: PTPRB  
 17: IL18  
 16: IL1RAPL1  
 15: C5ORF13  
 14: NLGN1  
 13: PBX1  
 12: TGM2  
 11: ENPP1  
 10: FN1  
 9: ANXA3  
 8: IGFBP3  
 7: NOG  
 6: LIF  
 5: SEMA3A  
 4: SPP1  
 3: SFRP1  
 2: ITGB3  
 1: SLIT2

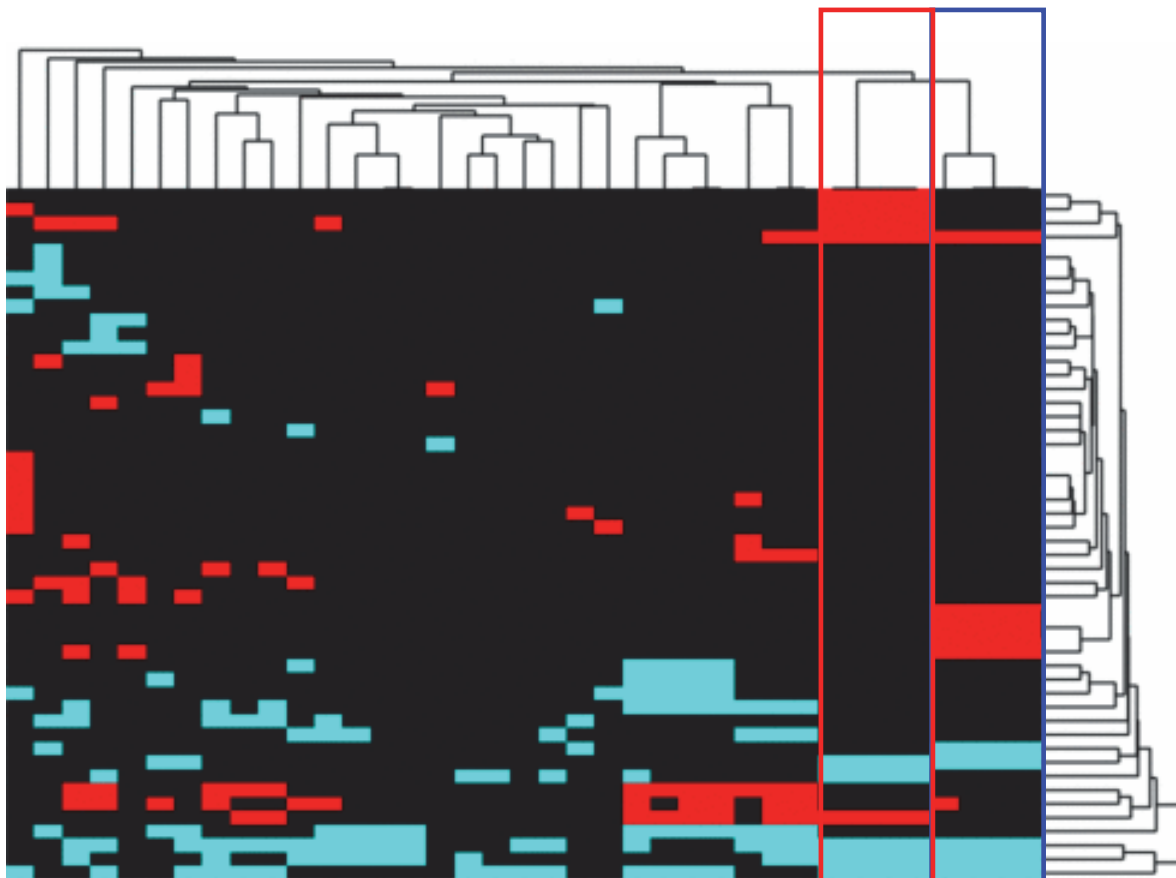

GO:0016337\_cell-cell\_adhesion  
 GO:0006954\_inflammatory\_response  
 GO:0008284\_positive\_regulation\_of\_cell\_proliferation  
 GO:0008285\_negative\_regulation\_of\_cell\_proliferation  
 GO:0042098\_T\_cell\_proliferation  
 GO:0031099\_regeneration  
 GO:0048545\_response\_to\_steroid\_hormone\_stimulus  
 GO:0035295\_tube\_development  
 GO:0022612\_gland\_morphogenesis  
 GO:0001763\_morphogenesis\_of\_a\_branching\_structure  
 GO:0051051\_negative\_regulation\_of\_transport  
 GO:0048771\_tissue\_remodeling  
 GO:0046849\_bone\_remodeling  
 GO:0034103\_regulation\_of\_tissue\_remodeling  
 GO:0046850\_regulation\_of\_bone\_remodeling  
 GO:0051593\_response\_to\_folic\_acid  
 GO:0014909\_smooth\_muscle\_cell\_migration  
 GO:0014912\_negative\_regulation\_of\_smooth\_muscle\_cell\_migration  
 GO:0071503\_response\_to\_heparin  
 GO:0001933\_negative\_regulation\_of\_protein\_phosphorylation  
 GO:0018149\_peptide\_cross\_linking  
 GO:0016339\_calcium\_dependent\_cell-cell\_adhesion  
 GO:0060284\_regulation\_of\_cell\_development  
 GO:0045664\_regulation\_of\_neuron\_differentiation  
 GO:0051960\_regulation\_of\_nervous\_system\_development  
 GO:0050767\_regulation\_of\_neurogenesis  
 GO:0001503\_ossification  
 GO:0045596\_negative\_regulation\_of\_cell\_differentiation  
 GO:0051093\_negative\_regulation\_of\_developmental\_process  
 GO:0040012\_regulation\_of\_locomotion  
 GO:0030334\_regulation\_of\_cell\_migration  
 GO:2000145\_regulation\_of\_cell\_motility  
 GO:0051270\_regulation\_of\_cellular\_component\_movement  
 GO:0001944\_vasculature\_development  
 GO:0001525\_angiogenesis  
 GO:0001568\_blood\_vessel\_development  
 GO:0048514\_blood\_vessel\_morphogenesis

**Supplementary Fig. s3.** Functional clustering analyses of genes affected by the TIP-1 knockdown within D54 cells. Microarray data were analyzed with GoMiner software (NCI, NIH). The blue box highlights genes which are involved in angiogenesis-related classification. The red box highlights the genes associated with cell motility. The up-regulated genes are marked as red, while down-regulated ones as green.

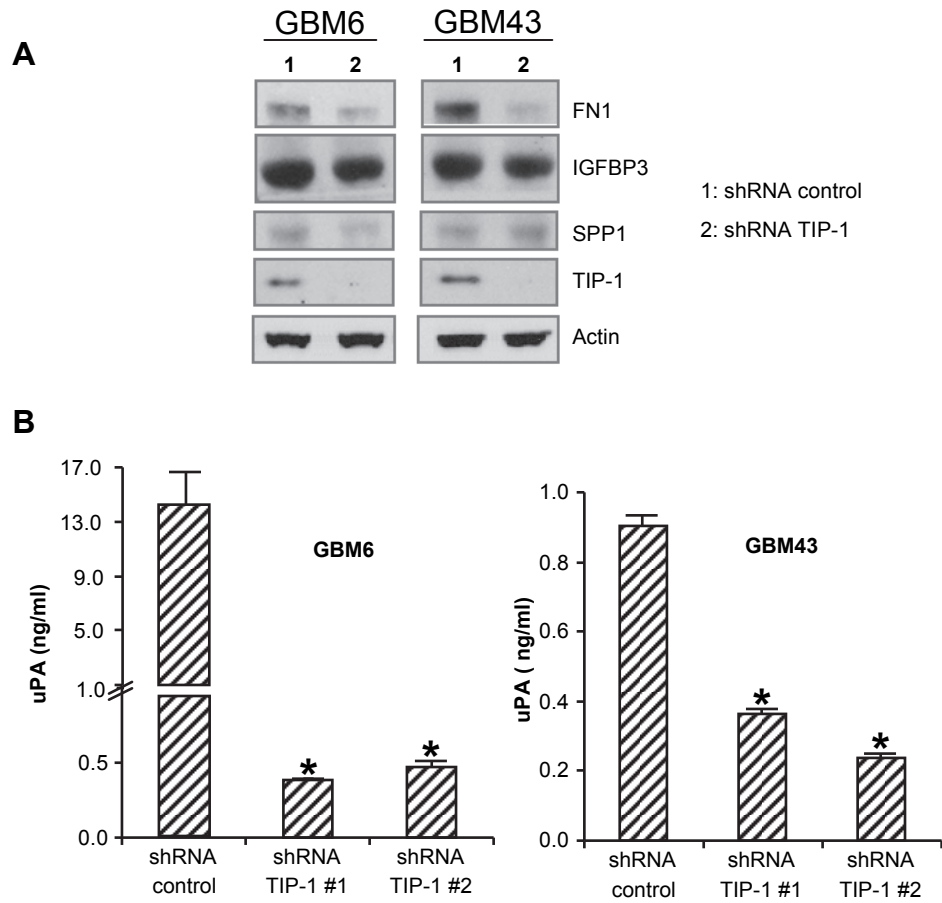

**Supplementary Fig. s4.** TIP-1 regulated FN1 expression and uPA secretion in two xenograft cell lines of human glioblastoma. GBM6 and GBM 43 were maintained as xenograft cell lines of primary human glioblastoma. TIP-1 knockdown with recombinant lentivirus encoding a control or TIP-1-targeted shRNA was conducted as described in the materials and methods. Protein expression in the whole cell lysates was analyzed with western blot (A), and uPA secretion in the pre-conditioned medium was determined with ELISA (B). \*  $p < 0.05$ ,  $n = 3$ , the Student's  $t$ -test.
